# Supplementary material
Source: publisher figshare collection journal article supplement (https://karger.figshare.com/ndownloader/files/7873936)

1           **TOP: Prospective evaluation of a volume based, computer assisted method for**  
2                                   **transperineal optimized prostate biopsy**

3  
4 C Kesch (1), JP Radtke (1,2), IV Popeneciu (3), C Gasch (1), SC Dieffenbacher (1), T Klein (1),  
5 HP Schlemmer (3), K Wieczorek (4), P Zogal (5), M Hohenfellner (1), G Sakas (5), BA  
6 Hadaschik (1)

7  
8           (1) Department of Urology, University Hospital Heidelberg, Germany  
9           (2) Division of Radiology, German Cancer Research Center (dkfz), Heidelberg, Germany  
10          (3) Department of Urology, University Hospital Göttingen, Germany  
11          (4) Institute of Pathology, University Hospital Heidelberg, Germany  
12          (5) MedCom GmbH, Darmstadt, Germany

13  
14  
15 **Running head:** TOP: transperineal optimized prostate biopsy

16 **Key words:** prostate biopsy, transperineal biopsy, transperineal template-guided mapping  
17 biopsy, transperineal template-guided saturation biopsy, prostate cancer

18  
19 **Corresponding author**

20 Claudia Kesch  
21 Department of Urology, University Hospital Heidelberg, Germany  
22 Im Neuenheimer Feld 110  
23 69120 Heidelberg  
24 Germany  
25 E-mail: claudia.kesch@med.uni-heidelberg.de  
26 Tel: +49-6221-56-36453  
27 Fax: +49-6221-56-5366

28  
29 Word count abstract: 215

30 Word count: 3.629

31

32

33

34 **Abstract**

35 Objective:

36 Prospective evaluation of a volume based, computer assisted method for transperineal  
37 optimized prostate(TOP) biopsy. The TOP algorithm automates core planning for systematic  
38 prostate biopsies using the 3D organ contour and an alterable volume for tumors to be  
39 excluded.

40

41 Subjects and methods:

42 Between 10/2013 and 03/2014 172 men underwent magnetic resonance imaging (MRI)-  
43 transrectal ultrasound (TRUS) fusion biopsy with MRI targeted biopsies and systematic-TOP  
44 biopsies. Systematic biopsies were placed according to TOP for detection of tumor volumes  
45 greater than 0.5 ml with a minimum of 80% organ coverage in prostates up to 50 ml (70% in  
46 larger organs).

47

48 Results:

49 Median 24 TOP cores and 3 MRI-targeted biopsies (TB) have been placed. Prostate cancer  
50 (PCa) was detected in 112 of 172(65%) of men. TOP detected 109(97%) and TB 62(55%).  
51 Significant cancer (Gleason score  $\geq 7$ ) was detected in 75(44%) of men and of these TOP  
52 detected 73/75(97%) and TB 51/75(68%). Overall, systematic-TOP sampling significantly  
53 outperformed TB for the detection of both, all PCa as well as significant PCa ( $p < 0.0001$ ,  
54  $p = 0.0005$ ).

55

56 Conclusion:

57 The TOP method is innovative by integrating the individual prostate volume and PCa-volume  
58 detection thresholds. In the present cohort, it diagnosed more significant tumors than TB  
59 alone. However, at the same time more low-risk tumors are detected.

60

61

62 **Introduction:**

63 The goal of prostate cancer (PCa) diagnosis is detection of significant tumors and accurate  
64 characterization of disease in order to reliably stratify patients for an appropriate treatment  
65 option such as active surveillance, focal therapy or radical treatment with prostatectomy or  
66 radiation. Conventional 12 core trans-rectal ultrasound (TRUS)-biopsy shows an average  
67 sensitivity of 48% for detecting clinically significant PCa [1] and is therefore clearly not  
68 fulfilling those demands. Multiparametric magnetic resonance imaging (mpMRI) in  
69 combination with fusion-biopsy might overcome this insufficiency. The MRI targeted  
70 approach alone was shown to diagnose 10-30% more significant cancers and 10-17% less  
71 indolent tumors [2,3] in comparison with 12 core standard TRUS-biopsy. Nevertheless,  
72 mpMRI has been shown to miss significant cancers in 10-16% [4–6] as well. In combination  
73 with targeting errors of mpMRI-fusion techniques this can add up to 22-36% [5,6] of  
74 significant tumors being missed, illustrating that for the time being systematic biopsies  
75 should not be omitted . There is not yet consensus on what might be the ideal approach and  
76 amount of systematic biopsies as this is always a challenging compromise between maximal  
77 diagnostic accuracy, potential side effects, cost and practicability. Increasing the sampling  
78 density of conventional transrectal biopsy showed practically no increased PCa detection  
79 rate compared to standard 12 core TRUS biopsy [7], most probably due to difficulties  
80 sampling the anterior and apical regions using the transrectal approach [8,9]. The  
81 transperineal approach as alternative allows systematic core placing in the whole prostate  
82 including apex, anterior and transition zones [10, 11]. Reproducible high sensitivity has been  
83 reported using transperineal template mapping biopsy (TTMB) which requires an extensive  
84 amount of median 48 cores per patient [12,13], whereas a prostate volume adapted  
85 saturation approach of 24 to 38 cores has been suggested by the Ginsburg study Group [14].

86

87 In the present study we investigate a novel volume based, automated core-placement  
88 method for transperineal optimized prostate (TOP) biopsy, which can be used in addition to  
89 fusion biopsies and also in patients without suspicious MRI-findings or MRI incompatibility.

90

91 **Patients and methods:**

92 Study Population:

93 Between October 2013 and March 2014 a total of 172 men with abnormal PSA or suspicious  
94 digital-rectal examination (DRE), persistent suspicion of prostate cancer after previous  
95 negative biopsy or under active surveillance underwent targeted MRI/TRUS-fusion biopsy  
96 (TB) and systematic-TOP biopsy. Institutional review board approval was granted (S-  
97 280/2012) and informed consent was obtained from all patients before each intervention.  
98 Data are reported according to START (Standards of Reporting for MRI-targeted biopsy  
99 studies) criteria [15] (Table 1).

100

101 Imaging:

102 mpMRI was performed using a 3T system without endorectal coil (Magnetom, Siemens,  
103 Erlangen, Germany) as described previously [5] (Supplementary Table 1). MRI analysis was  
104 performed prospectively by, or under supervision of an expert urologist (HPS)  
105 according to the 2012 European Society of Urogenital Radiology guidelines [16]. Reflecting  
106 clinical routine at the time of data collection, analysis was performed based on PIRADS  
107 Version 1 [16] and radiologists were not blinded to clinical data.

108

109 Model of Systematic Random Sampling:

110 MRI/TRUS-fusion biopsies were performed using the transperineal, template-guided  
111 BiopSee® System (MedCom, Darmstadt, Germany). This system consists of a computer, a  
112 biplane endorectal ultrasound (US) device fixed to a stepper, a template likewise attached to  
113 the stepper and electronics to control ultrasound position and orientation. During  
114 intervention a 3-dimensional (3D) US is acquired by moving the device with the stepper  
115 along the prostate from cranial to caudal. Next, 3D US and MRI are fused together in a semi-  
116 automated manner. In general, a rigid fusion algorithm is applied. However, if needed, the  
117 3D US can be contoured as well with subsequent elastic fusion of US and MRI imaging data.  
118 Afterwards biopsy cores are placed virtually within the 3D data set. Biopsies are then taken  
119 through the software-suggested template hole under continuous longitudinal US guidance  
120 [17]. The system can be operated using the novel TOP algorithm for computer-aided,  
121 automated core planning for systematic prostate biopsies using the 3D organ contour and an  
122 adjustable volume for tumors to be detected (*vd*), which can be selected freely by the

123 urologist. Thereby the requested number of cores ( $N$ ) is calculated with  $N = CA_{DR} \times P_{eff} / bc$   
124 with  $P_{eff}$  being the prostate volume to be sampled (approximated as  $P_{eff} = \pi/6 \times (a-d/2) \times (b-$   
125  $d/2) \times (c-d/2)$  with  $a$ ,  $b$  and  $c$  being the prostate dimensions in apical-basal, left-right and  
126 ventral-dorsal directions and  $d$  being the approximated diameter of the disease lesion),  $bc$   
127 being the core sampling volume (based on  $vd$  and an estimated core length of 1.7 to 2 cm)  
128 and  $CA_{DR}$  being the volitional cancer detection rate which can be equated with the achieved  
129 organ coverage. Cores are equally and automatically distributed over the complete organ  
130 volume (Figure 1).

131

132 Core placement and TOP characteristics applied in this study:

133 After segmentation of the prostate on MRI with marking the prostate contour and suspicious  
134 lesion and MRI/TRUS-fusion, automatic placement of systematic biopsies was performed  
135 using a  $vd$  of 0.5 ml. This means that the virtual core placing is performed with a needle  
136 distribution sampling each conceivable tumor lesion  $\geq 0.5$ ml in the complete prostate  
137 (100%). Yet, reflecting clinical routine, the operator was able to remove or change core  
138 positions if wanted, for example cores crossing the urethra. However, we required a minimal  
139 organ coverage of 80% for a prostate volume  $\leq 50$  ml and 70% for a prostate volume  $> 50$  ml  
140 in order to be included in this study. TB were placed manually on mpMRI suspicious lesions  
141 PIRADS  $> 2$ , independently of the location of TOP cores with a median amount of 2 cores per  
142 lesion. Subsequently, biopsies were performed starting with TB and followed by systematic-  
143 TOP sampling.

144

145 Histopathologic analysis:

146 Histopathologic biopsy specimens were analyzed under the supervision of a dedicated  
147 uropathologist (KW), according to the International Society of Urological Pathology  
148 standards [18]. Significant PCa was defined as Gleason score  $\geq 7$ .

149

150 Statistical Analysis:

151 Statistical analysis was performed using SPSS Statistics (V23, IBM Corp, Armonk, NY, USA). P  
152 values were calculated using McNemar test with a significance level of 5%. To evaluate the  
153 magnitude of differences in the detection rates of systematic-TOP and TB rate differences  
154 along with 95% confidence intervals were calculated according to Tango [19].

155

156

157

158

159

160

161

162

163

164

165 **Results:**

166 The 172 men included in this study had a median age of 65 years and pre-biopsy PSA of 7.2  
167 ng/ml. For 95 men this was their primary biopsy, 77 men already had a previous TRUS  
168 biopsy. 51 of them underwent repeat-examination due to persistent suspicion of cancer  
169 after previous negative TRUS biopsy and 26 for re-stratification purposes with assumed low-  
170 risk disease amenable for active surveillance. The median amount of systematic-TOP  
171 biopsies per patient was 24. Table 1 summarizes the characteristics of the study population.  
172 PCa was diagnosed in 112 men (65%) and clinically significant disease was identified in 75  
173 men (44%). Subgroup analysis showed an overall cancer detection rate of 72% (significant  
174 disease 54%) for the primary-biopsy cohort, 45% (significant disease 24%) for the repeat-  
175 biopsy cohort and 81% (significant disease 46%) for the active surveillance-cohort. The  
176 pathological features stratified to Gleason scores and PIRADS are summarized in Table 2. The  
177 comparison of systematic-TOP and TB (Table 3) demonstrates clear inferiority of TB for both,  
178 all PCa and significant PCa ( $p < 0.0001$  and  $p = 0.0005$ ) with TB missing 30 of 92 PCa and 19 of  
179 70 significant PCa in case of PIRADS > 2 lesions. Notably, in 12 cases of the 30 PCa missed by  
180 TB and detected by the systematic approach, the positive TOP cores were located in the  
181 prostate region with the MRI-suspicious lesion, clearly demonstrating a targeting error of the  
182 TB approach. Systematic-TOP did miss cancer as well. However, taking the combined  
183 approach as reference (Table 3), no significant inferiority was revealed for all PCa and  
184 significant PCa, respectively ( $p = 0.2482$  and  $p = 0.4795$ ). Altogether, in a total number of 112  
185 PCa locations, systematic TOP detected 109 and missed 3, of whom 2 were classified as  
186 significant PCa. Retrospective analysis of these 3 cases identified operator error in one case,  
187 in a second case a true error (a low-risk tumor found with TB was missed by systematic-TOP  
188 cores), and the third case could not be clearly assigned to one or the other error class.

189

190

191 **Discussion:**

192 The here introduced systematic-TOP prostate biopsies have two major advantages. First, the  
193 possibility to adjust the volume for tumors to-be-detected (*vd*) and the volitional cancer  
194 detection rate thereby allowing an approach adaptable to each individual patient's needs  
195 and risk assessment. Second, it is to the greatest possible extent independent from the  
196 operator and is therefore an ideal tool to assist untrained urologists as well as for creating  
197 intra-and inter-observer independent examinations.

198

199 The TOP algorithm uses the organ volume, the desired percentage of organ coverage and  
200 the adjustable *vd* volume for calculating the number of cores needed; coverage and *vd* are  
201 freely adjustable. By using a *vd* of 0.5 ml and a minimal organ coverage of 80% for a prostate  
202 volume  $\leq 50$  ml and of 70% for a prostate volume  $> 50$  ml, systematic-TOP with a median  
203 amount of 24 cores per patient significantly outperformed TB. Using such a volume adjusted  
204 stringent systematic saturation approach, the combination of the two biopsy methods did  
205 not have significant additional benefit. The detected overall-cancer rates with 65% for all  
206 patients and 72%, 45% and 81% for the primary biopsy cohort, the repeat biopsy cohort and  
207 the surveillance-cohort, respectively, are clearly compatible compared to other  
208 transperineal template-guided saturation (TTSB) or mapping biopsy studies (TTPM): for  
209 primary biopsy cohorts detection rates of 54%-76% have been reported using a mean  
210 amount of 19-54 cores [20–23], for repeat biopsy cohorts detection rates of 26%-68% with a  
211 mean amount of 18-59 cores have been reported [21,22,24–28]. In series in which TTPM  
212 biopsies was followed by RP, TTPM was highly accurate in detecting and excluding clinically  
213 significant disease [30,31]. This seems plausible as the TTPM approach can technically miss  
214 only those tumors that are smaller than the distance between the adjacent cores (5-mm).  
215 Our approach using an adjustable *vd* follows the same principle, since comparably to TTPM  
216 also only those tumors that are smaller as the *vd* can be missed. On the other side, it is more  
217 flexible because the *vd* can be changed in 0.1ml steps.

218

219 The ideal amount and spatial distribution in the different prostate zones, or alternatively the  
220 location-specific ideal core density, needs yet to be investigated. Only a little amount of  
221 studies directly compares different approaches. In a computer-simulated study of  
222 transperineal prostate biopsy Crawford et al. compared biopsies using grid sizes of 5-mm



223 (method A) and 10-mm (method B) and found a significant difference between the detection  
224 rates for all (84% vs. 59%) and for significant PCa (95% vs 78%) [12]. Valerio et al. examined  
225 the value of three artificially simulated modified strategies comparing them against full 5-  
226 mm TTPM. Strategy 1 excluded the anterior areas of the prostate; strategies 2 and 3  
227 involved a reduced sampling density from 5 to 10 mm by omitting intervening areas. For  
228 detection of clinically significant disease the strategies 1, 2 and 3 had sensitivities of 78%,  
229 85% and 84%, respectively. Contrary to that a study conducted at Nara Medical University  
230 examined the cancer detection rates at 5 mm, 10 mm and 15 mm core intervals and did not  
231 find any significant difference between the 5 mm and 10 mm intervals (personal  
232 communication).

233

234 A drawback of all, TTPM, TTSB and the here introduced systematic-TOP strategy, is the  
235 necessity for general anesthesia as well as the larger number of needles, resulting in  
236 corresponding larger trauma, extensive pathological processing and associated cost.  
237 Nevertheless, as described in the introduction, transperineal systematic biopsies cannot yet  
238 be safely omitted in favor of a TB only approach. Moreover, they are well tolerated and have  
239 only minor, temporarily side effects like haematuria, short term catheterization, erectile  
240 deterioration or fever with no septic complications being reported [32]. Thus, patients seem  
241 to handle them at least as good as conventional TRUS biopsy [33]. Our data supports the  
242 hypothesis that next to MRI invisible tumors one main reason for negative TB are targeting  
243 errors [34]. Thus, improving TB targeting or, alternatively, implementing target saturation of  
244 suspicious MRI locations, might be a way to reduce systematic biopsies in the future.

245

246 A limitation of our study is the missing direct comparison to a standardized reference test  
247 such as conventional biopsy or radical prostatectomy. Also, reflecting clinical routine at our  
248 institution at the time of the study, the operator was not blinded to MRI results and  
249 systematic-TOP and TB were performed by the same operator. Data collection was  
250 performed prospectively, but analysis was performed retrospectively. We defined significant  
251 disease as Gleason score  $\geq 7$ , which is debatable. However, a standard definition of  
252 significant disease for TTSB, TTPM and fusion-biopsy is still missing. Various definitions are  
253 used throughout the literature, which has to be kept in mind when comparing different  
254 studies.

255 **Conclusion:**

256 The TOP method is innovative by integrating the individual prostate volume and detection  
257 thresholds. With a volume for tumors to be detected of 0.5 ml, TOP diagnosed significantly  
258 **more** significant tumors than targeted biopsies. However, at the same time more low-risk  
259 tumors are detected.

260

261

262

263

264

265

266

267 References:

268 1 Ahmed HU, El-Shater Bosaily A, Brown LC, Gabe R, Kaplan R, Parmar MK, et al.:  
269 Diagnostic accuracy of multi-parametric MRI and TRUS biopsy in prostate cancer (PROMIS): a  
270 paired validating confirmatory study. *The Lancet* [Epub ahead of print].

271 2 Siddiqui MM, Rais-Bahrami S, Turkbey B, George AK, Rothwax J, Shakir N, et al.:  
272 Comparison of MR/ultrasound fusion-guided biopsy with ultrasound-guided biopsy for the  
273 diagnosis of prostate cancer. *JAMA* 2015 Jan 27;313:390–397.

274 3 Meng X, Rosenkrantz AB, Mendhiratta N, Fenstermaker M, Huang R, Wysock JS, et  
275 al.: Relationship Between Prebiopsy Multiparametric Magnetic Resonance Imaging (MRI),  
276 Biopsy Indication, and MRI-ultrasound Fusion–targeted Prostate Biopsy Outcomes. *Eur Urol*  
277 2016 Mar;69:512–517.

280 4 Delongchamps NB, Lefèvre A, Bouazza N, Beuvon F, Legman P, Cornud F: Detection of  
281 Significant Prostate Cancer with Magnetic Resonance Targeted Biopsies—Should Transrectal  
282 Ultrasound-Magnetic Resonance Imaging Fusion Guided Biopsies Alone be a Standard of  
283 Care? *J Urol* 2015 Apr;193:1198–1204.

284 5 Radtke JP, Schwab C, Wolf MB, Freitag MT, Alt CD, Kesch C, et al.: Multiparametric  
285 Magnetic Resonance Imaging (MRI) and MRI-Transrectal Ultrasound Fusion Biopsy for Index  
286 Tumor Detection: Correlation with Radical Prostatectomy Specimen. *Eur. Urol.* 2016;70:846-  
287 53.

288 6 Filson CP, Natarajan S, Margolis DJA, Huang J, Lieu P, Dorey FJ, et al.: Prostate cancer  
289 detection with magnetic resonance-ultrasound fusion biopsy: The role of systematic and  
290 targeted biopsies. *Cancer* 2016 Mar 15;122:884–892.

291 7 Irani J, Blanchet P, Salomon L, Coloby P, Hubert J, Malavaud B, et al.: Is an Extended  
292 20-Core Prostate Biopsy Protocol More Efficient than the Standard 12-Core? A Randomized  
293 Multicenter Trial. *J Urol* 2013 Jul;190:77–83.

298

- 299 8 Wright JL, Ellis WJ: Improved prostate cancer detection with anterior apical prostate  
300 biopsies. *Urol Oncol Semin Orig Investig* 2006 Nov;24:492–495.  
301
- 302 9 Hossack T, Patel MI, Huo A, Brenner P, Yuen C, Spernat D, et al.: Location and  
303 Pathological Characteristics of Cancers in Radical Prostatectomy Specimens Identified by  
304 Transperineal Biopsy Compared to Transrectal Biopsy. *J Urol* 2012 Sep;188:781–785.  
305
- 306 10 Pepe P, Dibenedetto G, Pennisi M, Fraggetta F, Colecchia M, Aragona F: Detection  
307 rate of anterior prostate cancer in 226 patients submitted to initial and repeat transperineal  
308 biopsy. *Urol Int* 2014;93:189–192.  
309
- 310 11 Dieffenbacher SC, Popeneciu IV, Radtke JP, Teber D, Hohenfellner M, Hadaschik BA,  
311 Hatiboglu G. Diagnostic accuracy of transperineal MRI fusion Biopsy in Comparison to  
312 transrectal biopsy with regards to incidental Findings in TURP. *Urol Int*. [In press].  
313
- 314 12 Crawford ED, Wilson SS, Torkko KC, Hirano D, Stewart JS, Brammell C, et al.: Clinical  
315 staging of prostate cancer: a computer-simulated study of transperineal prostate biopsy. *BJU*  
316 *Int* 2005 Nov 1;96:999–1004.  
317
- 318 13 Valerio M, Anele C, Charman SC, van der Meulen J, Freeman A, Jameson C, et al.:  
319 Transperineal template prostate-mapping biopsies: an evaluation of different protocols in  
320 the detection of clinically significant prostate cancer. *BJU Int* 2016 Sep 1;118:384–390.  
321
- 322 14 Kuru TH, Wadhwa K, Chang RTM, Echeverria LMC, Roethke M, Polson A, et al.:  
323 Definitions of terms, processes and a minimum dataset for transperineal prostate biopsies: a  
324 standardization approach of the Ginsburg Study Group for Enhanced Prostate Diagnostics.  
325 *BJU Int* 2013 Sep 1;112:568–577.  
326
- 327 15 Moore CM, Kasivisvanathan V, Eggener S, Emberton M, Fütterer JJ, Gill IS, et al.:  
328 Standards of Reporting for MRI-targeted Biopsy Studies (START) of the Prostate:  
329 Recommendations from an International Working Group. *Eur Urol* 2013 Oct;64:544–552.  
330

331 16 Barentsz JO, Richenberg J, Clements R, Choyke P, Verma S, Villeirs G, et al.: ESUR  
332 prostate MR guidelines 2012. *Eur Radiol* 2012 Feb 10;22:746–757.  
333

334 17 Hadaschik BA, Kuru TH, Tulea C, Rieker P, Popeneciu IV, Simpfendörfer T, et al.: A  
335 Novel Stereotactic Prostate Biopsy System Integrating Pre-Interventional Magnetic  
336 Resonance Imaging and Live Ultrasound Fusion. *J Urol* 2011 Dec;186:2214–2220.  
337

338 18 van der Kwast TH, Amin MB, Billis A, Epstein JI, Griffiths D, Humphrey PA, et al.:  
339 International Society of Urological Pathology (ISUP) Consensus Conference on Handling and  
340 Staging of Radical Prostatectomy Specimens. Working group 2: T2 substaging and prostate  
341 cancer volume. *Mod Pathol* 2011 Jan;24:16–25.  
342

343 19 Tango T: Equivalence test and confidence interval for the difference in proportions  
344 for the paired-sample design. *Stat Med* 1998 Apr 30;17:891–908.  
345

346 20 Bittner N, Merrick GS, Bennett A, Butler WM, Andreini HJ, Taubenslag W, et al.:  
347 Diagnostic Performance of Initial Transperineal Template-guided Mapping Biopsy of the  
348 Prostate Gland. *Am J Clin Oncol* 2015 Jun;38:300–303.  
349

350 21 Vyas L, Acher P, Kinsella J, Challacombe B, Chang RTM, Sturch P, et al.: Indications,  
351 results and safety profile of transperineal sector biopsies (TPSB) of the prostate: a single  
352 centre experience of 634 cases. *BJU Int* 2014 Jul;114:32–37.  
353

354 22 Symons JL, Huo A, Yuen CL, Haynes A-M, Matthews J, Sutherland RL, et al.: Outcomes  
355 of transperineal template-guided prostate biopsy in 409 patients. *BJU Int* 2013 Sep;112:585–  
356 593.  
357

358 23 Taira AV, Merrick GS, Bennett A, Andreini H, Taubenslag W, Galbreath RW, et al.:  
359 Transperineal template-guided mapping biopsy as a staging procedure to select patients  
360 best suited for active surveillance. *Am J Clin Oncol* 2013 Apr;36:116–120.  
361

- 362 24 Gershman B, Zietman AL, Feldman AS, McDougal WS: Transperineal template-guided  
363 prostate biopsy for patients with persistently elevated PSA and multiple prior negative  
364 biopsies. *Urol Oncol Semin Orig Investig* 2013 Oct;31:1093–1097.  
365
- 366 25 Ekwueme K, Simpson H, Zakhour H, Parr NJ: Transperineal template-guided  
367 saturation biopsy using a modified technique: outcome of 270 cases requiring repeat  
368 prostate biopsy. *BJU Int* 2013 Jun;111:E365-373.  
369
- 370 26 Bittner N, Merrick GS, Butler WM, Bennett A, Galbreath RW: Incidence and  
371 Pathological Features of Prostate Cancer Detected on Transperineal Template Guided  
372 Mapping Biopsy After Negative Transrectal Ultrasound Guided Biopsy. *J Urol* 2013  
373 Aug;190:509–514.  
374
- 375 27 Mabweesh NJ, Lidawi G, Chen J, German L, Matzkin H: High detection rate of  
376 significant prostate tumours in anterior zones using transperineal ultrasound-guided  
377 template saturation biopsy. *BJU Int* 2012 Oct;110:993–997.  
378
- 379 28 Pal RP, Elmussareh M, Chanawani M, Khan MA: The role of a standardized 36 core  
380 template-assisted transperineal prostate biopsy technique in patients with previously  
381 negative transrectal ultrasonography-guided prostate biopsies. *BJU Int* 2012 Feb;109:367–  
382 371.  
383
- 384 29 Abdollah F, Novara G, Briganti A, Scattoni V, Raber M, Roscigno M, et al.: Trans-rectal  
385 Versus Trans-Perineal Saturation Rebiopsy of the Prostate: Is There a Difference in Cancer  
386 Detection Rate? *Urology* 2011 Apr;77:921–925.  
387
- 388 30 Lecornet E, Ahmed HU, Hu Y, Moore CM, Nevoux P, Barratt D, et al.: The Accuracy of  
389 Different Biopsy Strategies for the Detection of Clinically Important Prostate Cancer: A  
390 Computer Simulation. *J Urol* 2012 Sep;188:974–980.  
391
- 392 31 Crawford ED, Rove KO, Barqawi AB, Maroni PD, Werahera PN, Baer CA, et al.: Clinical-  
393 Pathologic Correlation Between Transperineal Mapping Biopsies of the Prostate and Three-

394 Dimensional Reconstruction of Prostatectomy Specimens. *The Prostate* 2013 May 1;73:778–  
395 787.

396

397 32 Wadhwa K, Carmona-Echeveria L, Kuru T, Gaziev G, Serrao E, Parashar D, et al.:  
398 Transperineal prostate biopsies for diagnosis of prostate cancer are well tolerated: a  
399 prospective study using patient-reported outcome measures. *Asian J Androl* 2017 Jan  
400 19;1;62-66.

401

402 33 Sarkar D, Ekwueme K, Parr N: Patient-Reported Experience of Modified Transperineal  
403 Template Guided Saturation Biopsy Under General Anaesthesia and without Prophylactic  
404 Catheterisation. *Urol Int* 2016 Mar 22;96:479–483.

405

406 34 Cash H, Günzel K, Maxeiner A, Stephan C, Fischer T, Durmus T, et al.: Prostate cancer  
407 detection on transrectal ultrasonography-guided random biopsy despite negative real-time  
408 magnetic resonance imaging/ultrasonography fusion-guided targeted biopsy: reasons for  
409 targeted biopsy failure. *BJU Int* 2016 Jul 1;118:35–43.

410

411

412 **Funding:**

413 BA Hadaschik acknowledges support from the German Research Foundation.

414

415 **Conflict of interest:**

416 G Sakas is CEO of MedCom. P Zogal is an employee of MedCom. The other authors have no  
417 conflicts of interest to disclose.

418

419

420

421

422

423

424

425

426

427

428

429

430

431

432

433

434

435

436

437

438

439

440

441

442

443



444 **Tables:**

445 **Table 1.** Study population and results according to START criteria.

|                                                            |                      |
|------------------------------------------------------------|----------------------|
| Men included in analysis, n                                | 172                  |
| Age, years, median (IQR)                                   | 65 (58 – 71)         |
| Pre-biopsy PSA level, ng/ml, median (IQR)                  | 7.2 (5.4 – 10.2)     |
| Suspicious DRE findings ( ≥ T2), n (%)                     | 37 (21.5)            |
| Prostate volume, ml, median (IQR)                          | 46 (36 – 60)         |
| PSA density, median (IQR)                                  | 0.15 (0.10 – 0.26)   |
| Men without prior prostate biopsy, n (%)                   | 95 (55.2)            |
| Men with prior prostate biopsy, n (%)                      | 77 (44.8)            |
| Number of cores in prior biopsy, median (IQR)              | 12 (10-17)           |
| Patients undergoing active surveillance, n (%)             | 26 (15.1)            |
| Men with PI-RADS > 2 lesions on mpMRI, n (%)               | 127 (73.8)           |
| Number of lesions PI-RADS > 2                              | 167                  |
| Patients with one PI-RADS > 2 lesion                       | 90                   |
| Patients with two PI-RADS > 2 lesion                       | 34                   |
| Patients with three PI-RADS > 2 lesion                     | 3                    |
| Overall PI-RADS score 3 lesions, n (% of PI-RADS > 2)      | 75 (44.9)            |
| Overall PI-RADS score 4 lesions, n (% of PI-RADS > 2)      | 53 (31.7)            |
| Overall PI-RADS score 5 lesions, n (% of PI-RADS > 2)      | 39 (23.4)            |
| Biopsies per patient, median (IQR)                         | 27 (25 – 29)         |
| Systematic-TOP biopsies per patient, median (IQR)          | 24 (23 – 27)         |
| Targeted biopsies per patient and per lesion, median (IQR) | 3 (0 – 4), 2 (2 – 3) |
| Organ coverage with biopsies, median (IQR)                 | 90 (84 – 93)         |

START = Standards of Reporting for MRI-targeted Biopsy Studies, n = Number, IQR = interquartile range, PSA = prostate-specific antigen, DRE = digital rectal examination, mpMRI = multiparametric magnetic resonance imaging, PI-RADS = Prostate Imaging Reporting and Data System, TOP= transperineal optimized prostate.

446

447 **Table 2.** Cancer detection rates according to PIRADS.

| PIRADS     | All (%) | ≤2 (%)  | 3 (%)   | 4 (%)   | 5 (%)  |
|------------|---------|---------|---------|---------|--------|
| No PCa     | 60 (35) | 25 (15) | 21 (12) | 13 (8)  | 1 (1)  |
| GS 3+3     | 37 (22) | 15 (9)  | 14 (8)  | 7 (4)   | 1 (1)  |
| GS 3+4     | 52 (30) | 4 (2)   | 14 (8)  | 21 (12) | 13 (8) |
| GS 4+3     | 11 (6)  | 1 (1)   | 2 (1)   | 0 (0)   | 8 (5)  |
| GS 4+4     | 3 (2)   | 0 (0)   | 0 (0)   | 0 (0)   | 3 (2)  |
| GS 4+5/5+4 | 9 (5)   | 0 (0)   | 0 (0)   | 1 (1)   | 8 (5)  |

448

449 PCa = Prostate cancer, GS = Gleason Score

450

451

452

453

454

455

456

457 **Table 3.** Comparison of systematic-TOP and targeted biopsies in patients with PIRADS > 2  
 458 lesions.

|                                                                                 |                                         |     |                                                                                         |
|---------------------------------------------------------------------------------|-----------------------------------------|-----|-----------------------------------------------------------------------------------------|
| <b>All tumors</b>                                                               | Detection rate in systematic-TOP biopsy | 89  | } Mc Nemar Test: p < 0.0001<br>Paired difference <sup>a</sup> (CI): 21.3% (13.5%-29.8%) |
|                                                                                 | Detection rate in targeted Biopsy       | 62  |                                                                                         |
|                                                                                 | Combined detection rate                 | 92  |                                                                                         |
| <b>Significant tumors (GS ≥ 3+4)</b>                                            | Detection rate in systematic-TOP biopsy | 68  | } Mc Nemar Test: p = 0.0005<br>Paired difference <sup>a</sup> (CI): 13.4% (7.1%-20.9%)  |
|                                                                                 | Detection rate in targeted Biopsy       | 51  |                                                                                         |
|                                                                                 | Combined detection rate                 | 70  |                                                                                         |
|                                                                                 |                                         | 459 |                                                                                         |
| <sup>a</sup> according to Tango<br>GS = Gleason score, CI = confidence interval |                                         | 460 |                                                                                         |

461

462 **Figure legends:**

463 **Figure 1.** **A** Needle plan following systematic-TOP recommendations. **B and C** Moving the  
 464 biopsy needle along the path. **D** Scheme of the prostate volume covered by one biopsy core.

465

466 **Figure 2.** Patient with a PIRADS 5 lesion undergoing MRI-fusion TB and systematic-TOP  
 467 biopsies. **A** Axial scheme of the core distribution with 22 systematic-TOP cores and 4 TB  
 468 cores. **B** core distribution on axial ultrasound view. **C** Core distribution on 3-dimensional  
 469 prostate reconstruction. **D** Sagittal core distribution. **Blue arrow** The button “Automatic  
 470 placement” activates the systematic-TOP placement of cores. **Orange arrow** Selection of the  
 471 tumor volume to be detected. **Green arrow** TOP statistics providing amongst others organ  
 472 coverage (93%) and theoretical needle count (22).

473

474

475

476

477

478

479

480

481

482

483

484

485

486

487

488

489 **Supplementary Tables:**

490 **Supplementary Table 1.** Multiparametric MRI protocol including sequence parameters.

| Parameter               | T1 TSE    | T2 TSE    | epi-2D                               | DCE TWIST           |
|-------------------------|-----------|-----------|--------------------------------------|---------------------|
| TR ms/ TE ms            | 792/11    | 5120/143  |                                      | 3100/52 4.42/2.2    |
| Flip angle (°)          | 90        | 90        |                                      | 90 15               |
| ETL length/ Epi- factor | 72        | 12        |                                      | 96 x                |
| Averages                | 2         | 4         |                                      | 5 x                 |
| b-value                 | x         | x         | 0, 50, 100, 150, 200, 250, 800, 1000 | x                   |
| Section thickness (mm)  | 5         | 3         |                                      | 3 1,5               |
| FOV (mm)                | 320       | 300       |                                      | 280 400             |
| Resolution              | 1.1 x 1.0 | 0.8 x 0.7 |                                      | 2.2 x 2.2 1.6 x 1.6 |
| Acquisition time (min)  | 03:51     | 04:14     |                                      | 05:04 05:18         |

491

492

493

494

495

TR- Repetition Time, TE- Echo Time, ETL- Echo Train Length, FOV- Field of View, epi- Echo Planar Imaging, TSE- Turbo Spin Echo, TWIST- Time-resolved angiography With Interleaved Stochastic Trajectories, SE- Spin Echo, DCE- Dynamic contrast enhancement

Figure 1.

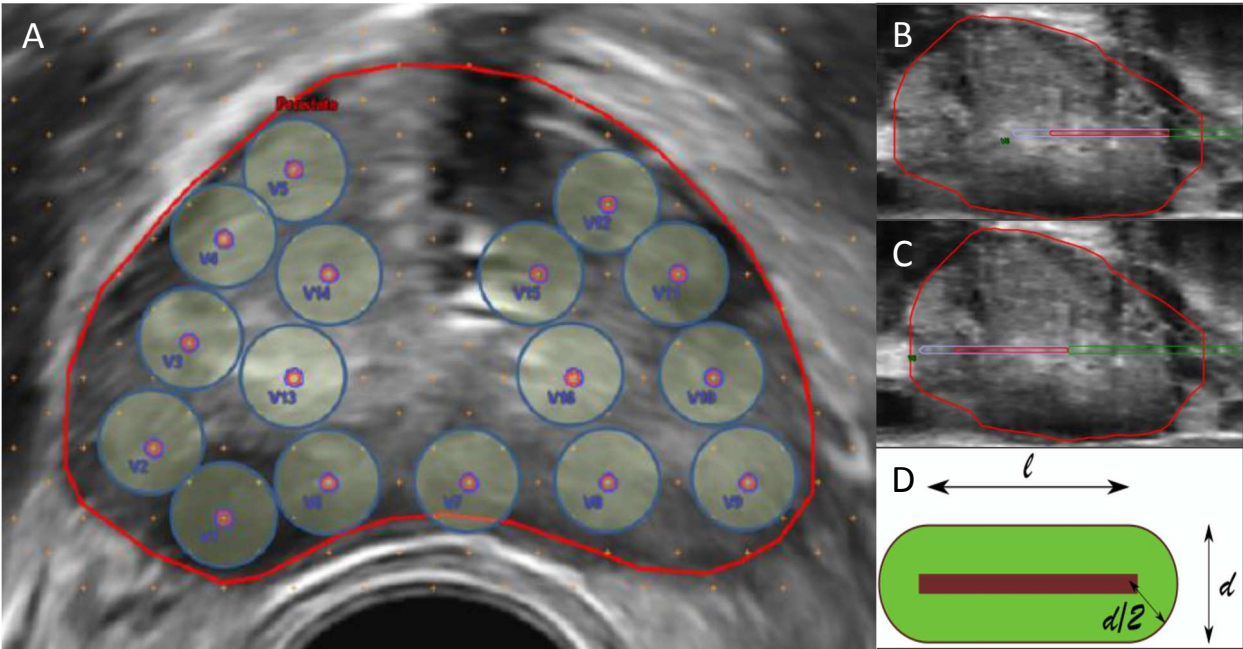

Figure 2.

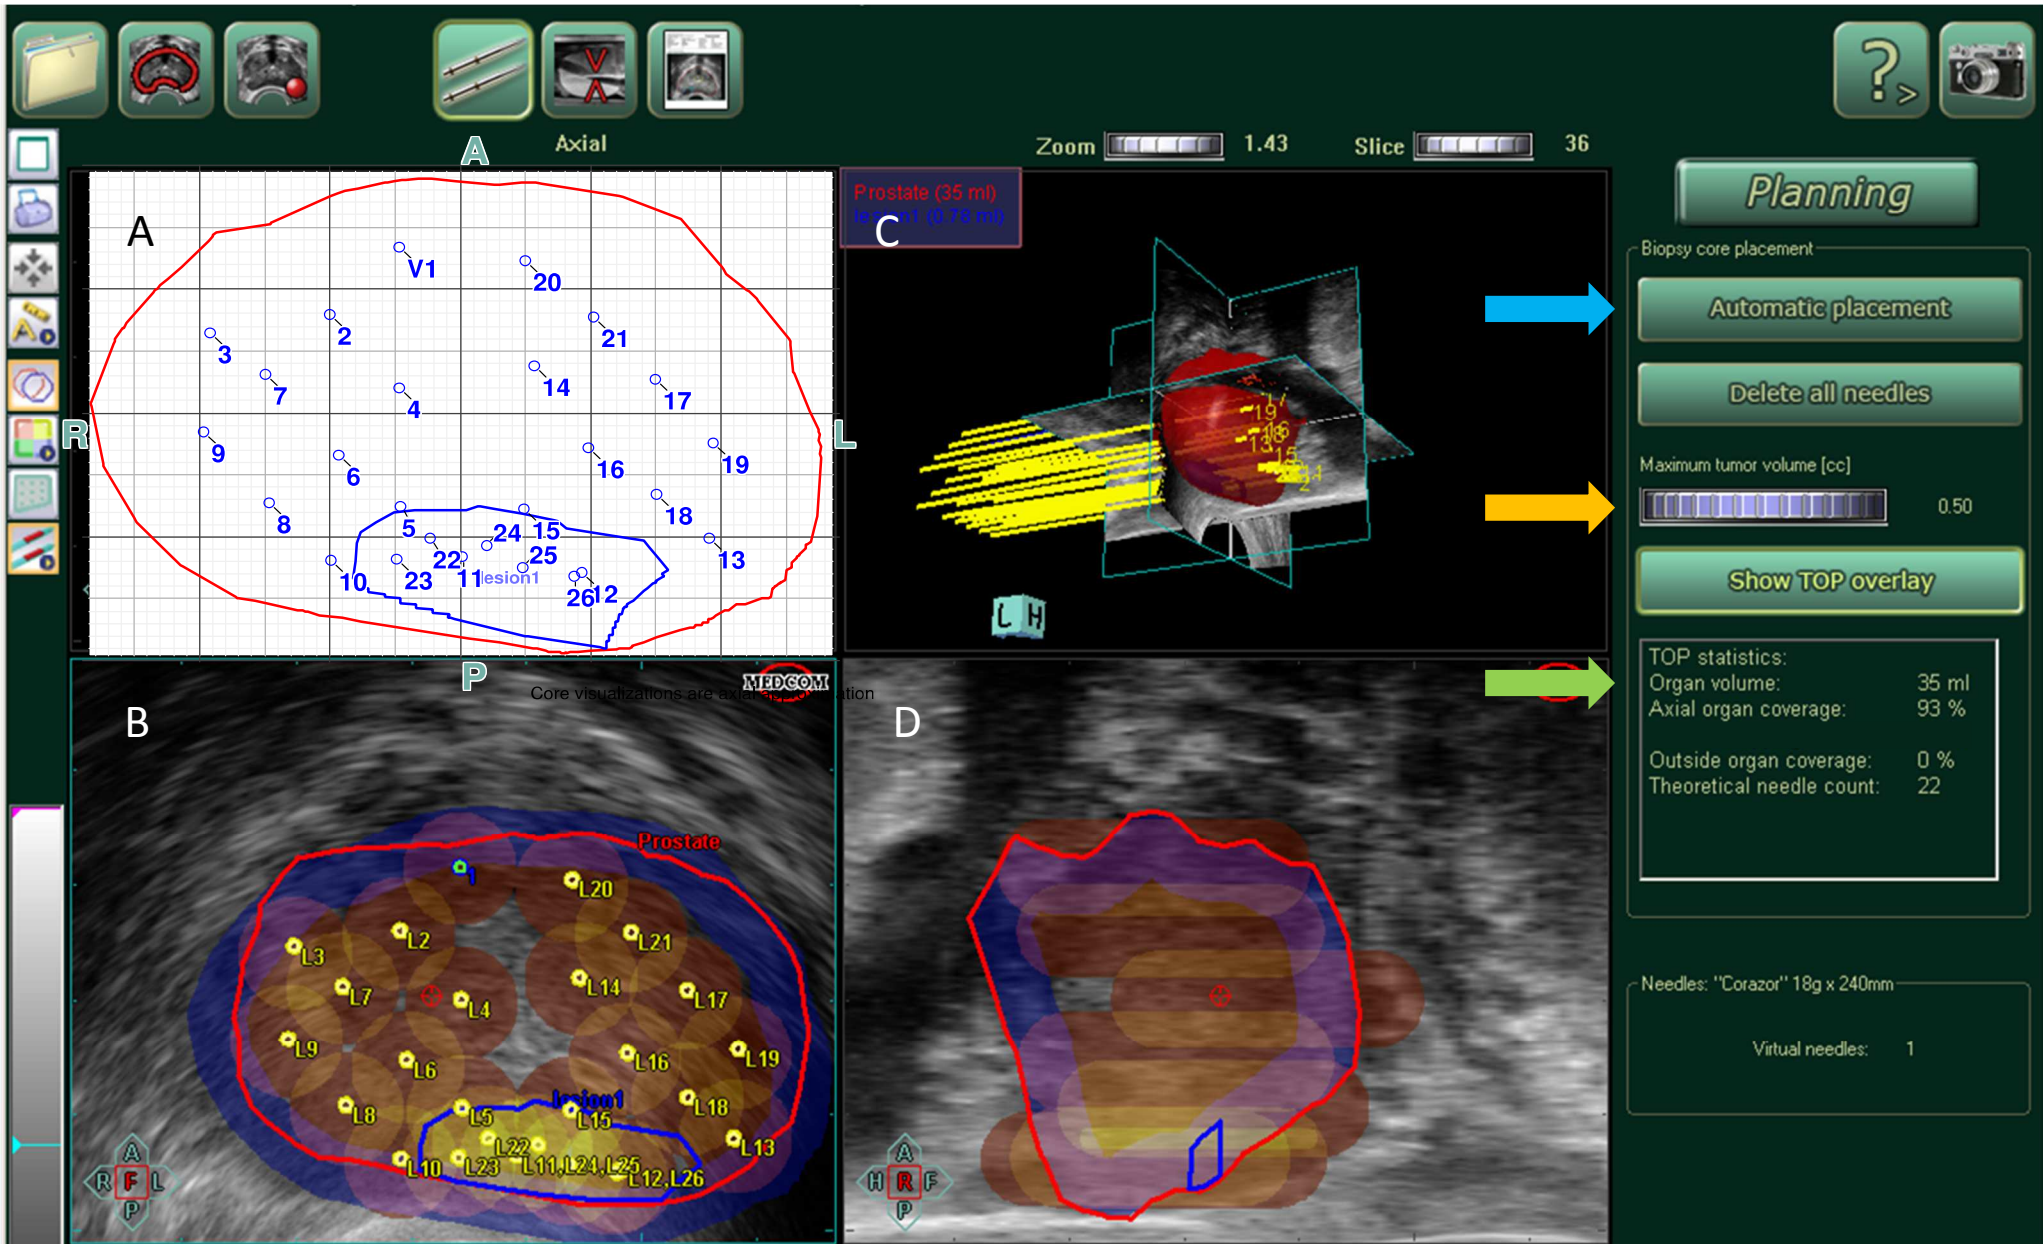

Supplement: Supplementary file 1 [file 7873936]
